1 **Genetic and potential antigenic evolution of influenza A(H1N1)pdm09 viruses circulating**  
2 **in Kenya during 2009-2018 influenza seasons**

3 D. Collins Owuor<sup>1\*</sup>, Zaydah R. de Laurent<sup>1</sup>, Bryan O. Nyawanda<sup>2</sup>, Gideon O. Emukule<sup>3</sup>,  
4 Rebecca Kondor<sup>4</sup>, John R. Barnes<sup>4</sup>, D. James Nokes<sup>1,5</sup>, Charles N. Agoti<sup>1,6</sup> and Sandra S.  
5 Chaves<sup>3,4</sup>

6

7 **Affiliations**

8 *1. Epidemiology and Demography Department, Kenya Medical Research Institute*  
9 *(KEMRI) - Wellcome Trust Research Programme, Kilifi, Kenya.*

10 *2. Kenya Medical Research Institute, Kisumu, Kenya.*

11 *3. Influenza Division, Centers for Disease Control and Prevention, Nairobi, Kenya.*

12 *4. Influenza Division, National Center for Immunization and Respiratory Diseases*  
13 *(NCIRD), Centers for Disease Control and Prevention, Atlanta, Georgia, USA.*

14 *5. School of Life Sciences and Zeeman Institute for Systems Biology and Infectious*  
15 *Disease Epidemiology Research (SBIDER), University of Warwick, Coventry, UK.*

16 *6. School of Public Health and Human Sciences, Pwani University, Kilifi, Kenya.*

17

18 **\* Corresponding author.** Dr. D. Collins Owuor ([collinsdowuor@gmail.com](mailto:collinsdowuor@gmail.com)).

19

20 **Keywords:** Influenza; next-generation sequencing; hemagglutinin; antigenic evolution;  
21 genetic groups.

22

23

24

25 **Abstract**

26 **Background.** Influenza viruses undergo rapid evolutionary changes, which requires  
27 continuous surveillance to monitor for genetic and potential antigenic changes in circulating  
28 viruses that can guide control and prevention decision making.

29

30 **Methods.** We sequenced and phylogenetically analyzed A(H1N1)pdm09 virus genome  
31 sequences obtained from specimens collected from hospitalized patients of all ages with or  
32 without pneumonia between 2009 and 2018 from seven sentinel surveillance sites across  
33 Kenya. We compared these sequences with recommended vaccine strains during the study  
34 period to infer genetic and potential antigenic changes in circulating viruses and determinants  
35 of clinical outcome.

36

37 **Results.** We generated and analyzed a total of 383 A(H1N1)pdm09 virus genome sequences.  
38 Phylogenetic analyses revealed that multiple genetic groups (clades, subclades, and subgroups)  
39 of A(H1N1)pdm09 virus circulated in Kenya over the study period; these evolved away from  
40 their vaccine strain, forming clades 7 and 6, subclades 6C, 6B, and 6B.1, and subgroups 6B.1A  
41 and 6B.1A1. Several amino acid substitutions among circulating viruses were associated with  
42 continued evolution of the viruses, especially in antigenic epitopes and receptor binding sites  
43 (RBS) of circulating viruses. Disease severity reduced with increase in age among children  
44 aged <5 years.

45

46 **Conclusion.** Our study highlights the utility of genomic surveillance to monitor the  
47 evolutionary changes of influenza viruses. Routine influenza surveillance with broad  
48 geographic representation and whole genome sequencing capacity to inform on the severity of  
49 circulating strains could improve selection of influenza strains for inclusion in vaccines.

50

## 51 **Introduction**

52 The first pandemic of the 21<sup>st</sup> century was a result of an influenza A virus (IAV) designated  
53 A(H1N1)pdm09 virus, which emerged in North America during March-April 2009 and spread  
54 rapidly among humans [1-3]. A(H1N1)pdm09 virus displaced seasonal A(H1N1) virus and has  
55 continued to circulate in subsequent years alongside influenza A(H3N2) and B viruses globally  
56 [4-6], causing annual seasonal epidemics [7-9]. The rapid ability of the virus to spread globally  
57 upon its emergence highlights the public health threat posed by emergent viruses [3, 10, 11].  
58 The countrywide surveillance for influenza viruses among medically-attended patients in  
59 Kenya since the emergence of the A(H1N1)pdm09 virus strain allows for exploring the  
60 phenotypic characteristics of the virus [7, 12, 13].

61

62 We characterized the genetic and antigenic evolution in A(H1N1)pdm09 viruses circulating in  
63 Kenya between 2009 and 2018 using codon-complete gene sequences generated through next-  
64 generation sequencing (NGS). We then utilized genetic sequence data and available clinical  
65 information to investigate determinants of clinical outcome among hospitalized children aged  
66 <5 years.

67

## 68 **Materials and Methods**

69 **Study design.** Samples analyzed in this study were collected between June 2009 and  
70 December 2018 through two health facility-based surveillance networks in Kenya as detailed  
71 previously [13]. The first involved continuous countrywide surveillance for influenza through  
72 severe acute respiratory illness (SARI) sentinel hospital reporting undertaken at six sites  
73 supported by the Centers for Disease Control (CDC)-Kenya Country office: Kenyatta National  
74 Hospital (KNH), Nakuru County and Referral Hospital (CRH), Nyeri CRH, Kakamega CRH,

75 Siaya CRH, and Coast General Teaching and Referral Hospital [7, 8, 13-16]. The second was  
76 the pediatric viral pneumonia surveillance undertaken at Kilifi County Hospital (KCH) [12].

77

78 In the CDC-supported surveillance sites (CDC-Kenya), SARI was defined as acute onset of  
79 illness (within the last 14 days) among hospitalized patients of all ages with cough and reported  
80 fever (feverish) or a recorded temperature of  $\geq 38^{\circ}\text{C}$ . Demographics, underlying diseases, and  
81 signs and symptoms were collected from patients who met the case definition; the patients were  
82 also assessed by study clinicians on physical and clinical findings. Furthermore, among  
83 hospitalized children aged  $<5$  years, additional clinical information including difficulty in  
84 breathing, lower chest wall indrawing, inability to drink or breastfeed, and nasal flaring were  
85 recorded. Chart review was done at the time of discharge or death to collect clinical outcome  
86 data. In the second facility-based surveillance undertaken at KCH from January 2009 through  
87 December 2018, a definition of pediatric viral pneumonia among children aged 1 day to 59  
88 months presenting with syndromic severe or very severe pneumonia was used. A history of  
89 cough for  $<30$  days or difficulty breathing, when accompanied by lower chest wall indrawing  
90 was defined as severe pneumonia; a history of cough for  $<30$  days or difficulty breathing, when  
91 accompanied by any one of prostration (including inability to feed or drink), coma, or  
92 hypoxemia (oxygen saturation  $<90\%$ ) was defined as very severe pneumonia [7, 16].

93

94 We selected a total of 418 (31.9%) A(H1N1)pdm09 virus positive SARI samples for this  
95 analysis based on real-time reverse-transcription (RT)-PCR cycle threshold (Ct) of  $<35.0$  (as  
96 proxy for high viral load), adequate sample volume for RNA extraction ( $>140\ \mu\text{L}$ ), and  
97 balanced distribution of samples based on surveillance sites and years. We also identified a  
98 total of 157 IAV positive specimens from the KCH surveillance site. These were not

99 subsequently subtyped for influenza A(H1N1)pdm09 and A(H3N2) viruses. Therefore, we  
100 utilized all these specimens in the current analysis.

101

102 **RNA extraction and multi-segment real-time PCR (M-RTPCR) for IAV.** We performed  
103 viral nucleic acid extraction from IAV and A(H1N1)pdm09 virus positive samples using the  
104 QIAamp Viral RNA Mini Kit (Qiagen). We then reverse transcribed the extracted RNA, and  
105 amplified the complete coding region of IAV genome in a single M-RTPCR using the Uni/Inf  
106 primer set [17]. We evaluated successful amplification by running the products on 2% agarose  
107 gel and visualized the reaction on a UV transilluminator after staining with RedSafe Nucleic  
108 Acid Staining solution (iNtRON Biotechnology Inc.,).

109

110 **IAV NGS and virus genome assembly.** Following PCR, we purified the amplicons with 1X  
111 AMPure XP beads (Beckman Coulter Inc., Brea, CA, USA), quantified amplicons with Quant-  
112 iT dsDNA High Sensitivity Assay (Invitrogen, Carlsbad, CA, USA), and normalized  
113 amplicons to 0.2 ng/ $\mu$ L. We generated indexed paired-end libraries from 2.5  $\mu$ L of 0.2 ng/ $\mu$ L  
114 amplicon pool using Nextera XT Sample Preparation Kit (Illumina, San Diego, CA, USA)  
115 following the manufacturer's protocol. We then purified amplified libraries using 0.8X  
116 AMPure XP beads, quantitated libraries using Quant-iT dsDNA High Sensitivity Assay  
117 (Invitrogen, Carlsbad, CA, USA), and evaluated libraries for fragment size in the Agilent 2100  
118 BioAnalyzer System using the Agilent High Sensitivity DNA Kit (Agilent Technologies, Santa  
119 Clara, CA, USA). We diluted the libraries to 2nM in preparation for pooling and denaturation  
120 for running on the Illumina MiSeq (Illumina, San Diego, CA, USA). We then NaOH denatured  
121 pooled libraries, diluted libraries to 12.5 pM, and sequenced on the Illumina MiSeq using 2 x  
122 250 bp paired end reads with the MiSeq v2 500 cycle kit (Illumina, San Diego, CA, USA). We  
123 added five percent Phi-X (Illumina, San Diego, CA, USA) spike-in to the libraries to increase

124 library diversity by creating a more diverse set of library clusters. We carried out contiguous  
125 (contigs) nucleotide sequence assembly from the sequence data using the FLU module of the  
126 Iterative Refinement Meta-Assembler (IRMA) using IRMA default settings. We deposited all  
127 the generated sequence data in the Global Initiative on Sharing All Influenza Data (GISAID)  
128 EpiFlu™ database (<https://platform.gisaid.org/epi3/cfrontend>).

129

130 **Phylogenetic clustering and genetic group classification.** We aligned and translated  
131 consensus nucleotide sequences for all gene segments in AliView version 1.26  
132 (<https://ormbunkar.se/aliview/>). We then reconstructed Maximum-likelihood (ML) trees for  
133 the individual gene segments using IQ-TREE version 2.0.7 (<http://www.iqtree.org/>). The  
134 software initiates tree reconstruction after assessment and selection of the best model of  
135 nucleotide substitution for alignment. We linked the ML trees to various metadata and  
136 visualized using R ggtree version 2.4.2 in R programming software v4.0.2  
137 (<http://www.rstudio.com/>). We used the codon-complete hemagglutinin (HA) sequences of all  
138 viruses to characterize A(H1N1)pdm09 virus strains into genetic groups (i.e., clades, subclades,  
139 and subgroups) using Phylogenetic Clustering using Linear Integer Programming (PhyCLIP)  
140 v2.0 (<https://github.com/alvinxhan/PhyCLIP>). We downloaded vaccine strains and reference  
141 viruses from GISAID EpiFlu™ database (<https://platform.gisaid.org/epi3/cfrontend>). We  
142 aligned and reconstructed ML trees using vaccine strains, reference viruses, and translated  
143 Kenyan A(H1N1)pdm09 viruses.

144

145 **Genetic characterization of amino acid substitutions in surface glycoproteins, matrix, and**  
146 **non-structural proteins.** We aligned the hemagglutinin (HA) and neuraminidase (NA)  
147 glycoproteins, matrix (M2), and non-structural 1 (NS1) gene segments of A(H1N1)pdm09  
148 virus from this study using MAFFT version 7.475 (<https://mafft.cbrc.jp/alignment/software/>).

149 We identified the amino acid substitutions in the antigenic epitopes (Sa, Sb, Ca<sub>1</sub>, Ca<sub>2</sub> and Cb)  
150 [18], receptor binding sites (RBS), and potential glycosylation sites of HA1 subunit of HA  
151 protein and substitutions in the codon-complete HA, NA, M2, and NS1 protein sequences of  
152 A(H1N1)pdm09 viruses using Flusurver (<https://flusurver.bii.a-star.edu.sg>; accessed on June  
153 01, 2021). We generated highlighter plots of Kenyan and reference sequences (obtained from  
154 the Global Initiative on Sharing All Influenza Data (GISAID) EpiFlu™ database -  
155 <https://platform.gisaid.org/epi3/cfrontend>) using inhouse python scripts to visualize amino acid  
156 differences in M2 and NS1 protein sequences among the sampled viruses.

157

158 **Predictors of severe infection among hospitalized children aged <5 years.** We used  
159 multivariable logistic regression in Stata version 16 (Stata Corp, College Station, Texas, USA)  
160 to investigate the predictors of severe infection among hospitalized patients. Only samples  
161 collected from hospitalized children aged <5 years from CDC-Kenya and KCH surveillance  
162 were used to estimate the predictors of severe infection. Children hospitalized with fever and  
163 acute cough were categorized as severe if they had breathing difficulty and/or lower chest wall  
164 indrawing, or otherwise non-severe. The predictors investigated included patient age  
165 (categorized as <12 months, 12-23 months, and ≥24 months), location of surveillance sites,  
166 year of A(H1N1)pdm09 virus sampling (pandemic period, 2009-10; post pandemic period,  
167 2011 onwards), A(H1N1)pdm09 virus genetic group, antigenic epitope substitutions, NS1  
168 protein substitutions, and Ct values as proxy for viral load distributed in tertiles.

169

170 **Ethics.** Ethical clearance for the study was granted by the Kenya Medical Research Institute  
171 (KEMRI) Scientific Steering Committee (SSC# 1899, 2558, and 2692) and KEMRI -  
172 Wellcome Trust Research Programme Scientific and Ethical Review Unit (SERU# 1055, 1433,  
173 and 3044). Informed consent was sought and received from the study participants for the study.

174 **Results**

175 **IAV sequencing and genome assembly.** We generated and analyzed a total of 383  
176 A(H1N1)pdm09 virus genome sequences. Among 418 A(H1N1)pdm09 virus positive samples  
177 from the CDC-Kenya surveillance system, 414 (99.1%) passed pre-sequencing quality control  
178 checks, which generated 344 (83.1%) codon-complete A(H1N1)pdm09 virus genome  
179 sequences on the MiSeq. Of the 157 IAV positive specimens available from KCH, 94 (59.9%)  
180 passed pre-sequencing quality control checks generating 45 (47.9%) A(H1N1)pdm09 virus (39  
181 codon-complete and 6 partial) and 49 (52.1%) A(H3N2) virus genome sequences (46 codon-  
182 complete and 3 partial). For this report, only the 39 codon-complete A(H1N1)pdm09 virus  
183 sequences were included in the analyses. The sociodemographic and clinical characteristics of  
184 these patients are shown in **Table 1**.

185



186 **Table 1.** Sociodemographic and clinical characteristics of hospitalized patients in severe acute  
 187 respiratory illness (SARI) and viral pneumonia surveillances in Kenya, 2009-18.

|                             |              | SARI surveillance |       | Viral pneumonia surveillance |      |
|-----------------------------|--------------|-------------------|-------|------------------------------|------|
|                             |              | n                 | %     | n                            | %    |
| Age                         | 0-11 months  | 73                | 21.2  | 18                           | 46.2 |
|                             | 12-59 months | 203               | 59.0  | 21                           | 53.8 |
|                             | >=5 years    | 68                | 19.8  |                              |      |
| Gender                      | Female       | 141               | 41.0  | 14                           | 35.9 |
|                             | Male         | 203               | 59.0  | 25                           | 64.1 |
| Fever                       | No           |                   |       | 1                            | 2.6  |
|                             | Yes          | 344               | 100.0 | 38                           | 97.4 |
| Cough                       | No           |                   |       | 1                            | 2.6  |
|                             | Yes          | 344               | 100.0 | 38                           | 97.4 |
| Breathing difficulty        | No           | 244               | 70.9  | 2                            | 5.1  |
|                             | Yes          | 100               | 29.1  | 37                           | 94.9 |
| In-drawing‡                 | No           | 144               | 41.9  | 1                            | 2.6  |
|                             | Yes          | 83                | 24.1  | 38                           | 97.4 |
| Nasal flaring‡              | No           | 158               | 45.9  | 13                           | 33.3 |
|                             | Yes          | 82                | 23.8  | 26                           | 66.7 |
| Unable to drink/breastfeed‡ | No           | 188               | 54.7  | 4                            | 10.3 |
|                             | Yes          | 26                | 7.6   | 35                           | 89.7 |
| Lethargic‡                  | No           | 141               | 41.0  | 4                            | 10.3 |
|                             | Yes          | 89                | 25.9  | 35                           | 89.7 |
| Wheezing                    | No           | 133               | 38.7  | 4                            | 10.3 |
|                             | Yes          | 10                | 2.9   | 35                           | 89.7 |
| Oxygen saturation           | <90          | 29                | 8.4   | 6                            | 15.4 |
|                             | >=90         | 128               | 37.2  | 33                           | 84.6 |
| Intensive Care Unit         | No           | 63                | 18.3  |                              |      |
|                             | Yes          | 15                | 4.4   |                              |      |
| Outcome                     | Death        | 8                 | 2.3   |                              |      |
|                             | Discharged   | 176               | 51.2  |                              |      |
|                             | Absconded    | 4                 | 1.2   |                              |      |

188  
 189 ‡ Chest in-drawing, nasal flaring, unable to drink/breastfeed at all, and lethargy in patients aged <5  
 190 years in SARI surveillance. SARI, severe acute respiratory illness.

191

192 **Circulation of A(H1N1)pdm09 virus strains in Kenya and their patterns of antigenic**  
193 **drift.** Phylogenetic analyses revealed that multiple genetic groups of influenza  
194 A(H1N1)pdm09 virus circulated in Kenya over the study period and evolved away from their  
195 vaccine strain, **Figure 1.** All Kenyan viruses from 2009-18 evolved away from the vaccine  
196 strains A/California/07/2009 (H1N1pdm09)-like virus and A/Michigan/45/2015  
197 (H1N1pdm09)-like virus. The A(H1N1)pdm09 virus strains from 2009 to 2016 (n=324;  
198 84.6%) evolved away from the 2009-17 Northern Hemisphere (NH) and 2009-16 Southern  
199 Hemisphere (SH) vaccine strain A/California/07/2009 (H1N1pdm09)-like virus and fell into  
200 clade 7 (n=97, 25.3%), clade 6 (n=132, 34.5%), subclade 6C (n=10, 2.6%), subclade 6B (n=47,  
201 12.3%), and subclade 6B.1 (n=38, 9.9%), respectively. All the viruses from 2018 evolved away  
202 from the 2017-18 NH and 2017 SH vaccine strain A/Michigan/45/2015 (H1N1pdm09)-like  
203 virus and fell into subgroup 6B.1A (n=57, 14.9%) and subgroup 6B.1A1 (n=2, 0.5%),  
204 respectively.  
205

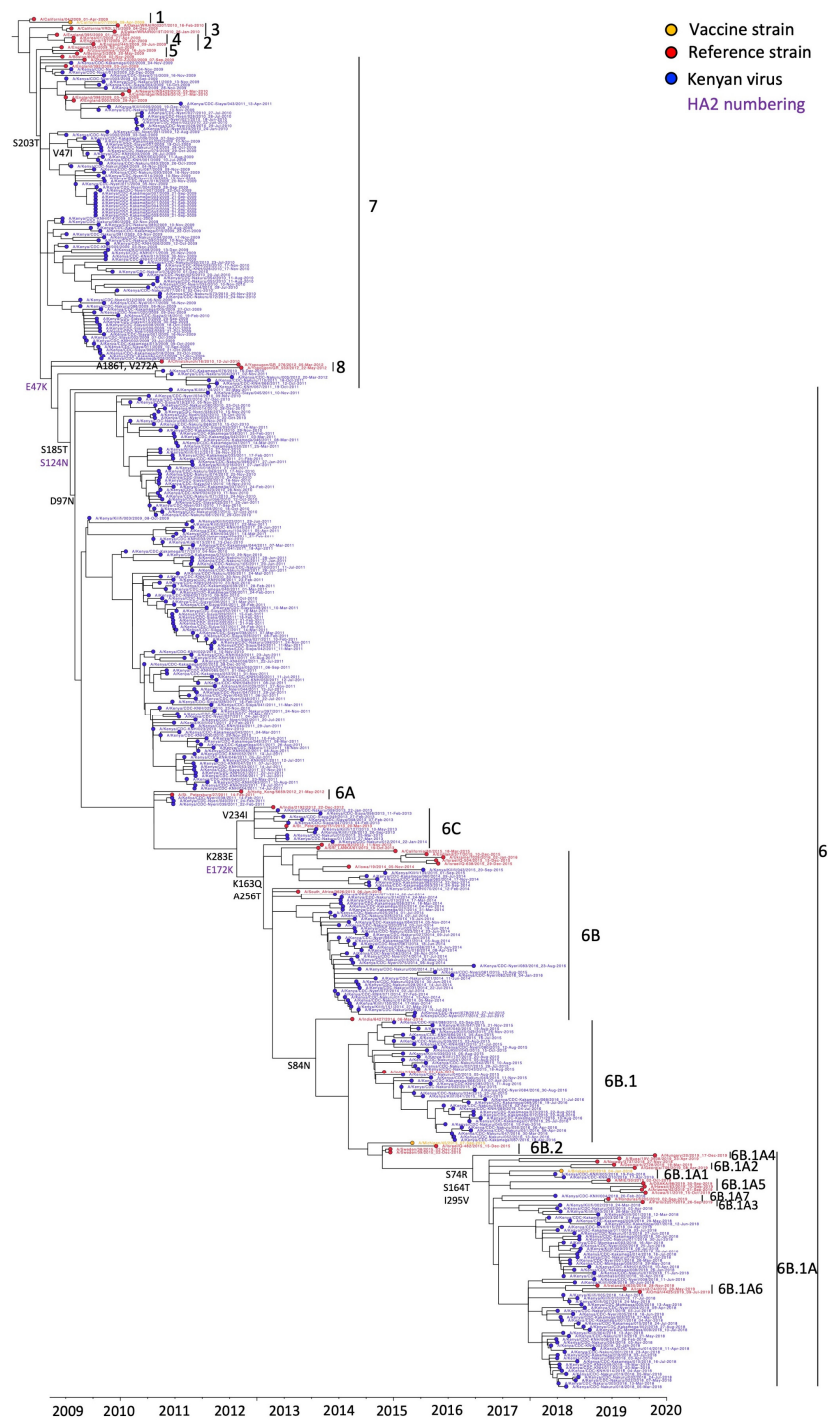

207

208 **Figure 1.** Maximum-likelihood phylogenetic tree of A(H1N1)pdm09 virus sequences from Kenya  
209 collected between 2009 and 2018, A(H1N1)pdm09 virus vaccine strains, and reference viruses. This is  
210 a time-calibrated phylogenetic tree with time shown on the x-axis. Branches are colored based on  
211 Kenyan, vaccine, and reference strains as shown in the color key. Amino acid substitutions in HA1 and  
212 HA2 subunits, which define A(H1N1)pdm09 virus genetic groups are also shown (HA2 substitutions  
are labelled in purple as shown in the color key).

213 Clades 6 and 7 viruses co-circulated in Kenya between 2009 and 2012, with clade 6 viruses  
214 carrying HA substitutions D97N, S185T, and S203T, while clade 7 viruses carried HA  
215 substitutions D97, S185, and S203T, **Figure 1**. Clade 6 viruses evolved into subclades 6A, 6B,  
216 and 6C; 6C carrying HA substitution V234I circulated in Kenya in 2013-14, while 6B with HA  
217 substitutions K163Q, A256T, and K283E circulated in Kenya in 2014-16. Subclade 6B evolved  
218 further into subgroup 6B.1 carrying additional HA substitution S84N, which dominated in  
219 2015-16. Subgroup 6B.1 further evolved into subgroups 6B.1A and 6B.1A1 carrying HA  
220 substitutions S74R, S164T, and I295V that dominated in 2018.

221

222 Comparison of the deduced amino acid sequences of the viruses identified in hospitalized  
223 patients relative to the vaccine strains from which all the 2009-18 strains considerably evolved  
224 revealed significant amino acid substitutions in antigenic epitopes and RBS among the  
225 circulating A(H1N1)pdm09 virus strains (**Table 2**). There were 13 amino acid substitutions  
226 across the five antigenic sites among sampled Kenyan viruses. Ranking from the most variable  
227 site, Sa, Ca<sub>2</sub>, Sb, Ca<sub>1</sub>, and Cb had two, six, six, three, and one substitution, respectively. The  
228 most frequent HA substitution per site for Sa, Sb, Ca<sub>1</sub>, Ca<sub>2</sub> and Cb was K163Q, S185T, S203T,  
229 A141E, and S74R, respectively. HA substitutions S203T and S185T were the most dominant  
230 substitutions occurring in 100% and 59.3% (227/383) viruses from 2009-18, respectively. In  
231 addition, we observed previously described HA substitutions at the RBS (A186T and D222E)  
232 and glycosylation sites (A186T and N125S) of the viruses.

233

234 **Table 2.** Antigenic drift among A(H1N1)pdm09 virus strains collected from Kenya, 2009-18.  
235

| Season    | Vaccine (Genetic group); hemisphere ‡ | Number of Kenyan viruses analyzed (year of sampling) | Amino acid substitutions †                                                                                                                                                                                                                                                                                         |
|-----------|---------------------------------------|------------------------------------------------------|--------------------------------------------------------------------------------------------------------------------------------------------------------------------------------------------------------------------------------------------------------------------------------------------------------------------|
| 2009-2017 | A/California/07/2009 (clade 1); NH    | 324 (2009-2016)                                      | P137S <sup>d</sup> , A139V <sup>d</sup> , A141T <sup>d</sup> , K142R <sup>d</sup> , K163Q <sup>a</sup> , G170R <sup>c</sup> , S185T <sup>b</sup> , S185A <sup>b</sup> , S185I <sup>b</sup> , A186T <sup>b</sup> , A186V <sup>b</sup> , D187N <sup>b</sup> , S203T <sup>c</sup> , R205K <sup>c</sup> , D222E, D222N |
| 2009-2016 | A/California/07/2009 (clade 1); SH    | 324 (2009-2016)                                      | P137S <sup>d</sup> , A139V <sup>d</sup> , A141T <sup>d</sup> , K142R <sup>d</sup> , K163Q <sup>a</sup> , G170R <sup>c</sup> , S185T <sup>b</sup> , S185A <sup>b</sup> , S185I <sup>b</sup> , A186T <sup>b</sup> , A186V <sup>b</sup> , D187N <sup>b</sup> , S203T <sup>c</sup> , R205K <sup>c</sup> , D222E, D222N |
| 2017-2018 | A/Michigan/45/2015 (6B.1); NH         | 59 (2018)                                            | S74R <sup>e</sup> , P137S <sup>d</sup> , A141E <sup>d</sup> , S164T <sup>a</sup>                                                                                                                                                                                                                                   |
| 2017      | A/Michigan/45/2015 (6B.1); SH         | 59 (2018)                                            | S74R <sup>e</sup> , P137S <sup>d</sup> , A141E <sup>d</sup> , S164T <sup>a</sup>                                                                                                                                                                                                                                   |

236

237 NH, Northern Hemisphere; SH, Southern Hemisphere.

238 † A (H1N1)pdm09 antigenic sites are represented as Sa-a; Sb-b; Ca<sub>1</sub>-c; Ca<sub>2</sub>-d; and Cb-e.

239 ‡ Recommended vaccines for each influenza season are adopted from Global Initiative on Sharing All  
240 Influenza Data (GISAID) (<https://www.gisaid.org/resources/human-influenza-vaccine-composition/>).

241

242

243 **Genetic and antigenic characterization of NA, M2, and NS1 proteins.** All NA proteins  
244 lacked the H275Y marker associated with resistance to neuraminidase inhibitors. However,  
245 seven (1.8%) NA proteins had substitutions T362I (3), I117M (3), and V234I (1). Additionally,  
246 all the Kenyan viruses contained the adamantane-resistance marker S31N, **Figure 2**. All 59  
247 viruses from 2018 had six amino acid substitutions (E55K, L90I, I123V, E125D, K131E, and  
248 N205S) in NS1 protein, **Figure 3**.

249

250

251

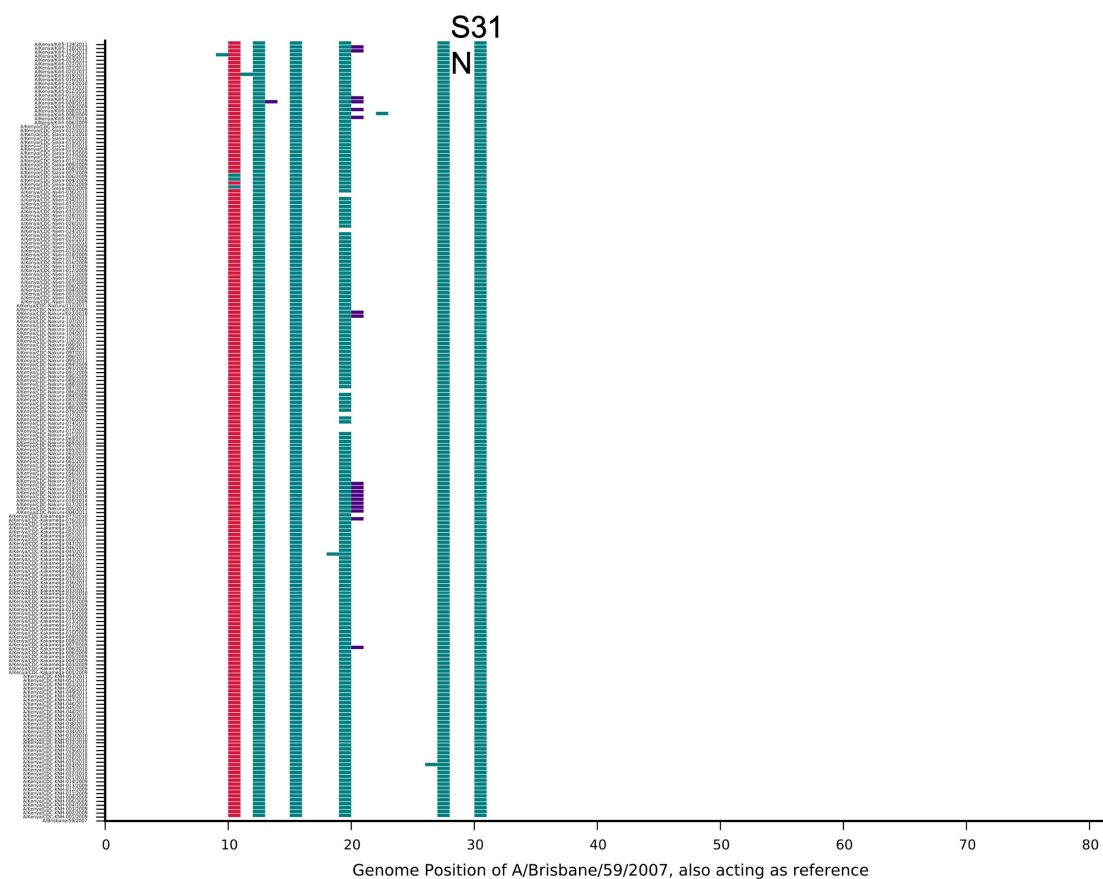

252

253

254 **Figure 2.** Highlighter plot of M2 protein sequences of A(H1N1)pdm09 viruses from Kenya  
255 showing the adamantane-resistance marker S31N amino acid substitution in M2 protein. The  
256 substitution was observed in all the A(H1N1)pdm09 viruses collected in Kenya between 2009  
257 and 2018. Sequences were aligned with A/Brisbane/59/2007.

258

259

260

261

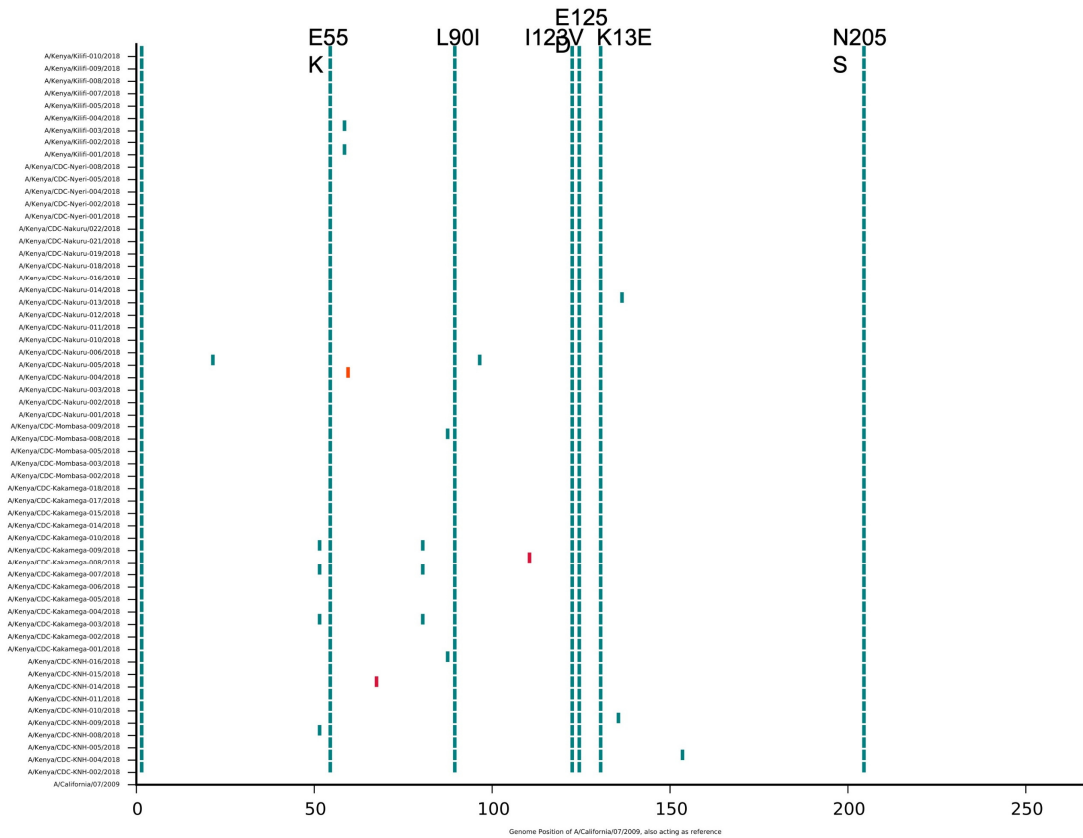

262

263

264 **Figure 3.** Highlighter plot of NS1 protein sequences of A(H1N1)pdm09 viruses from Kenya  
265 showing the NS1 protein substitutions: E55K, L90I, I123V, E125D, K131E, and N205S. The  
266 sequences were aligned with vaccine strain A/California/07/2009. The substitutions were  
267 reported for 59 virus sequences collected from hospitalized patients in 2018 from CDC-  
268 supported surveillance and KCH pediatric viral pneumonia surveillance. CDC, Centers for  
269 Disease Control; KCH, Kilifi County Hospital.

270

271 **Predictors of severe infection among hospitalized children aged <5 years.** We observed  
272 that severity of infection reduced with increase in age. Children aged  $\geq 24$  months were less  
273 likely to have severe infection compared to children aged 0-11 months (adjusted odds ratio  
274 (aOR), 0.25; 95% CI, 0.11-0.54) and that A(H1N1)pdm09 viruses of subclade 6B and clade 7  
275 were less likely associated with severe infection compared to clade 6 viruses (aOR, 0.25; 95%  
276 CI, 0.09-0.72) and (aOR, 0.34; 95% CI, 0.15-0.79), respectively (**Table 3**). Ct value, year of  
277 sampling, location of sampling, antigenic epitope substitutions, and NS1 protein substitutions  
278 were not associated with severe infection.  
279



280 **Table 3.** Predictors of severe infection among hospitalized children aged <5 years.

281

| Characteristics               | Severe, N=161<br>n (%) | Non-severe, N=108<br>n (%) | aOR (95% CI)        | p-value |
|-------------------------------|------------------------|----------------------------|---------------------|---------|
| <b>Age</b>                    |                        |                            |                     |         |
| <12 months                    | 68 (42.2)              | 20 (18.5)                  | Ref                 |         |
| 12-23 months                  | 58 (36.0)              | 29 (25.9)                  | 0.61<br>(0.28,1.32) | 0.21    |
| ≥24 months                    | 35 (21.7)              | 59 (54.6)                  | 0.25<br>(0.11,0.54) | <0.01   |
| <b>Ct value (tertiles)</b>    |                        |                            |                     |         |
| <22.5                         | 42 (26.1)              | 42 (38.9)                  | Ref                 |         |
| 22.5-25.5                     | 46 (28.6)              | 41 (38.0)                  | 0.87 (0.40,1.87)    |         |
| >25.5                         | 73 (45.3)              | 25 (23.2)                  | 1.64 (0.76,3.53)    |         |
| <b>Year</b>                   |                        |                            |                     |         |
| Pandemic                      | 44 (27.3)              | 32 (29.6)                  |                     |         |
| Post-pandemic                 | 117 (72.7)             | 76 (70.4)                  |                     |         |
| <b>Location</b>               |                        |                            |                     |         |
| Kakamega                      | 15 (9.3)               | 21 (19.4)                  | Ref                 |         |
| Kilifi                        | 39 (24.2)              | 0 (0)                      | -                   |         |
| Mombasa                       | 5 (3.1)                | 0 (0)                      | -                   |         |
| Nairobi                       | 33 (20.5)              | 19 (17.6)                  | 1.60<br>(0.56,4.60) | 0.38    |
| Nakuru                        | 36 (22.4)              | 38 (35.2)                  | 1.38<br>(0.54,3.56) | 0.5     |
| Nyeri                         | 18 (11.2)              | 22 (20.4)                  | 1.78<br>(0.61,5.22) | 0.29    |
| Siaya                         | 15 (9.3)               | 8 (7.4)                    | 2.01<br>(0.55,7.31) | 0.29    |
| <b>Genetic group</b>          |                        |                            |                     |         |
| Clade 6                       | 55 (34.2)              | 23 (21.3)                  | Ref                 |         |
| Subclade 6B                   | 14 (8.7)               | 25 (23.2)                  | 0.25<br>(0.09,0.72) | 0.01    |
| Subclade 6B.1                 | 32 (19.9)              | 5 (4.63)                   | 2.68<br>(0.81,8.94) | 0.11    |
| Subgroup 6B.1A                | 31 (19.3)              | 21 (19.4)                  | 0.62<br>(0.24,1.58) | 0.31    |
| Subgroup 6B.1A1               | 2 (1.2)                | 0 (0)                      |                     |         |
| Subclade 6C                   | 4 (2.5)                | 2 (1.9)                    | 0.68<br>(0.08,5.90) | 0.72    |
| Clade 7                       | 23 (14.3)              | 32 (29.6)                  | 0.34<br>(0.15,0.79) | 0.01    |
| <b>Antigenic substitution</b> |                        |                            |                     |         |
| Yes                           | 99 (61.5)              | 70 (64.8)                  |                     |         |
| No                            | 62 (38.5)              | 38 (35.2)                  |                     |         |
| <b>NS1 gene substitution</b>  |                        |                            |                     |         |
| Yes                           | 33 (20.5)              | 21 (19.4)                  |                     |         |
| No                            | 128 (79.5)             | 87 (80.6)                  |                     |         |

282

283 aOR, adjusted odds ratio; CI, confidence interval; Ct; cycle threshold.

284 **Discussion**

285 We observed that A(H1N1)pdm09 viruses circulating in Kenya from 2009-18 evolved away  
286 from their vaccine strain over the study period. Kenyan virus strains from 2009-16 evolved  
287 away from the 2009-17 NH and 2009-16 SH vaccine strain A/California/07/2009  
288 (H1N1pdm09)-like virus and fell into clades 7 and 6, and subclades 6C, 6B, and 6B.1,  
289 respectively. All viruses from 2018 evolved away from the 2017-18 NH and 2017 SH vaccine  
290 strain A/Michigan/45/2015 (H1N1pdm09)-like virus and fell into subgroups 6B.1A and  
291 6B.1A1, respectively. We identified considerable amino acid substitutions in antigenic  
292 epitopes and RBS among the circulating viruses, which confirms the continued evolution of  
293 circulating influenza viruses in Kenya. We recently reported that the evolutionary dynamics of  
294 A(H1N1)pdm09 virus in Kenya was associated with multiple virus introductions into the  
295 country between 2009 and 2018, although only a few of those introductions instigated local  
296 seasonal epidemics that then established local transmission clusters across the country [13].  
297 We also observed substitutions in NA protein, which have been associated with reduced  
298 susceptibility to neuraminidase inhibitors in vitro [19], substitutions in M2 protein associated  
299 with adamantane-resistance, and substitutions in NS1 protein that possibly result in increased  
300 virulence [20]. Nonetheless, we were not able to associate viral genetic changes and  
301 substitutions with increased severity.

302

303 Analysis of virus sequence data from Kenya during the pandemic in 2009 identified the  
304 introduction of clades 2 and 7 viruses into Kenya [21]. We recently confirmed these findings  
305 and showed that clades 6 and 7 viruses were introduced into Kenya, disseminated countrywide,  
306 and persisted across multiple epidemics as local transmission clusters [13]. A recent study from  
307 Kenya reported the circulation of clade 6B, subclade 6B.1, and subclade 6B.2 viruses in the  
308 2015-18 influenza seasons [22]. Here, through detailed genomic analysis, we extend these

309 observations and show that multiple influenza strains were introduced into Kenya and spread  
310 countrywide over the study period. Most of the amino acid substitutions associated with the  
311 continued evolution of A(H1N1)pdm09 viruses in Kenya have also been reported in other  
312 studies in Africa [22-25] and Asia [26, 27]. Therefore, the continuing evolution of  
313 A(H1N1)pdm09 viruses in Kenya is in part due to the global circulation of influenza viruses.

314

315 The genetic diversity of A(H1N1)pdm09 viruses in specific regions arising from multiple virus  
316 introductions and subsequent establishment of local transmission clusters [13] composed of  
317 viruses harboring considerable amino acid substitutions in antigenic epitopes and RBS could  
318 lead to predominance of circulating viruses that are not closely matched to previously selected  
319 vaccine strains as shown in our study. In countries like Kenya, where influenza virus spread is  
320 year-round [9], there also exists unpredictability of which genetic virus strain may predominate  
321 and when. Influenza vaccines with broad coverage (“universal” vaccines) could be key to  
322 managing the influenza disease burden in such settings. Currently, Kenya does not have a  
323 national influenza vaccination policy [28], but it would be important to consider deployment  
324 of quadrivalent influenza vaccines with representative A(H1N1)pdm09 virus, A(H3N2) virus,  
325 and both influenza B virus lineages (B/Victoria and B/Yamagata) for optimal vaccine  
326 effectiveness [13, 29, 30]. It will also be important to investigate further whether the use of SH  
327 or NH formulated vaccines could have a place in tropical regions like in Kenya, where virus  
328 importations from both hemispheres are common.

329

330 Specific influenza virus gene segment phylogenies and genetic group memberships have been  
331 associated with disease severity [31]. Although we did not observe associations between  
332 genetic group membership or substitutions with disease severity, these findings underscore the  
333 importance of reporting genetic surveillance data along with epidemiological data to allow for

334 analysis of factors that may increase risk of influenza and impact disease severity [32].  
335 Although we did not observe association between viral load and disease severity, larger studies  
336 have reported this association among hospitalized patients with pneumonia infection [33],  
337 which underscores the need for multi-site studies with improved statistical power to estimate  
338 associations. We reported a reduction in disease severity with increase in age in children aged  
339 <5 years, which corroborates the evidence that children aged <6 months may experience more  
340 severe influenza related complications [34].

341

342 The study had some limitations. First, the analysis in this report only involved the HA, NA,  
343 M2, and NS1 gene segments of A(H1N1)pdm09 virus. Although these regions are important  
344 in understanding antigenic drift and antiviral drug resistance in influenza viruses, important  
345 changes in other gene segments, for example, mutations associated with increased  
346 pathogenicity may not have been captured. Secondly, the prioritized samples were selected  
347 based on anticipated probability of successful sequencing inferred from the sample's viral load  
348 as indicated by the diagnosis Ct value. Such a strategy ultimately avoided NGS of some  
349 samples that may have been critical in inferring additional genetic characteristics of circulating  
350 influenza viruses. Lastly, the analysis in this report did not include phenotypic analyses to  
351 assess the effect of observed substitutions on virulence, pathogenicity, and transmissibility of  
352 influenza viruses.

353

354 In conclusion, our study highlights the utility of genomic surveillance to monitor the  
355 evolutionary changes of influenza viruses within a country and the utility of combined genetic  
356 and epidemiological data to improve understanding of influenza season severity and guide  
357 intervention. Routine influenza surveillance with broad geographic representation and whole

358 genome sequencing capacity to inform on the severity of circulating strains could improve

359 selection of influenza strains for inclusion in vaccines.

360

361 **Supporting information**

362 **Conflict of interest.** None

363

364 **Disclosure.** The findings and conclusions in this report are those of the authors and do not  
365 necessarily represent the official position of the Centers for Disease Control and Prevention.

366

367 **Funding:** The authors D.C.O. and C.N.A. were supported by the Initiative to Develop African  
368 Research Leaders (IDeAL) through the DELTAS Africa Initiative [DEL-15-003]. The  
369 DELTAS Africa Initiative is an independent funding scheme of the African Academy of  
370 Sciences (AAS)'s Alliance for Accelerating Excellence in Science in Africa (AESA) and  
371 supported by the New Partnership for Africa's Development Planning and Coordinating  
372 Agency (NEPAD Agency) with funding from the Wellcome Trust [107769/Z/10/Z] and the  
373 UK government. The study was also part funded by a Wellcome Trust grant [1029745] and the  
374 USA CDC grant [GH002133]. This paper is published with the permission of the Director of  
375 KEMRI.

376 **References**

- 377 1. Garten, R.J., et al., *Antigenic and genetic characteristics of swine-origin 2009 A(H1N1)*  
378 *influenza viruses circulating in humans*. Science, 2009. **325**(5937): p. 197-201.
- 379 2. Dawood, F.S., et al., *Emergence of a Novel Swine-Origin Influenza A (H1N1) Virus in*  
380 *Humans*. New England Journal of Medicine, 2009. **360**(25): p. 2605-2615.
- 381 3. Smith, G.J., et al., *Origins and evolutionary genomics of the 2009 swine-origin H1N1*  
382 *influenza A epidemic*. Nature, 2009. **459**(7250): p. 1122-5.
- 383 4. Baillie, G.J., et al., *Evolutionary dynamics of local pandemic H1N1/2009 influenza*  
384 *virus lineages revealed by whole-genome analysis*. J Virol, 2012. **86**(1): p. 11-8.
- 385 5. Zehender, G., et al., *Reconstruction of the evolutionary dynamics of the A(H1N1)pdm09*  
386 *influenza virus in Italy during the pandemic and post-pandemic phases*. PLoS One,  
387 2012. **7**(11): p. e47517.
- 388 6. Venter, M., et al., *Evolutionary dynamics of 2009 pandemic influenza A virus subtype*  
389 *H1N1 in South Africa during 2009-2010*. J Infect Dis, 2012. **206 Suppl 1**: p. S166-72.
- 390 7. Katz, M.A., et al., *Results From the First Six Years of National Sentinel Surveillance*  
391 *for Influenza in Kenya, July 2007–June 2013*. PLoS ONE, 2014. **9**(6): p. e98615.
- 392 8. Emukule, G.O., et al., *The burden of influenza and RSV among inpatients and*  
393 *outpatients in rural western Kenya, 2009-2012*. PLoS One, 2014. **9**(8): p. e105543.
- 394 9. Emukule, G.O., et al., *Influenza activity in Kenya, 2007-2013: timing, association with*  
395 *climatic factors, and implications for vaccination campaigns*. Influenza and Other  
396 Respiratory Viruses, 2016. **10**(5): p. 375-385.
- 397 10. Lemey, P., M. Suchard, and A. Rambaut, *Reconstructing the initial global spread of a*  
398 *human influenza pandemic: a Bayesian spatial-temporal model for the global spread*  
399 *of H1N1pdm*. PLoS Curr Biol, 2009. **1**(RRN1031).
- 400 11. Rambaut, A. and E. Holmes, *The early molecular epidemiology of the swine-origin*  
401 *A/H1N1 human influenza pandemic*. PLoS Currents, 2009. **1**: p. RRN1003.
- 402 12. Nokes, D.J., et al., *Incidence and severity of respiratory syncytial virus pneumonia in*  
403 *rural Kenyan children identified through hospital surveillance*. Clin Infect Dis, 2009.  
404 **49**(9): p. 1341-9.
- 405 13. Owuor, D.C., et al., *Characterizing the Countrywide Epidemic Spread of Influenza*  
406 *A(H1N1)pdm09 Virus in Kenya between 2009 and 2018*. Viruses, 2021. **13**(10): p.  
407 1956.
- 408 14. Katz, M.A., et al., *Epidemiology, Seasonality, and Burden of Influenza and Influenza-*  
409 *Like Illness in Urban and Rural Kenya, 2007-2013;2010*. The Journal of Infectious  
410 Diseases, 2012. **206**: p. S53-S60.
- 411 15. Feikin, D.R., et al., *The burden of common infectious disease syndromes at the clinic*  
412 *and household level from population-based surveillance in rural and urban Kenya*.  
413 PLoS One, 2011. **6**(1): p. e16085.
- 414 16. Emukule, G.O., et al., *The Epidemiology and Burden of Influenza B/Victoria and*  
415 *B/Yamagata Lineages in Kenya, 2012-2016*. Open forum infectious diseases, 2019.  
416 **6**(10): p. ofz421-ofz421.
- 417 17. Zhou, B. and D.E. Wentworth, *Influenza A virus molecular virology techniques*.  
418 Methods Mol Biol, 2012. **865**: p. 175-92.
- 419 18. A.J., C., et al., *The antigenic structure of the influenza virus A/PR/8/34 hemagglutinin*  
420 *(H1 subtype)*. Cell, 1982. **31**(2 Pt 1): p. 417-427.
- 421 19. Nguyen, H.T., A.M. Fry, and L.V. Gubareva, *Neuraminidase inhibitor resistance in*  
422 *influenza viruses and laboratory testing methods*. Antivir Ther, 2012. **17**(1 Pt B): p.  
423 159-73.

- 424 20. Clark, A.M., et al., *Functional Evolution of Influenza Virus NS1 Protein in Currently*  
425 *Circulating Human 2009 Pandemic H1N1 Viruses*. J Virol, 2017. **91**(17).
- 426 21. Gachara, G., et al., *Whole genome characterization of human influenza A(H1N1)pdm09*  
427 *viruses isolated from Kenya during the 2009 pandemic*. Infect Genet Evol, 2016. **40**: p.  
428 98-103.
- 429 22. Opanda, S., et al., *Assessing antigenic drift and phylogeny of influenza A (H1N1) pdm09*  
430 *virus in Kenya using HAI sub-unit of the hemagglutinin gene*. PLoS One, 2020. **15**(2):  
431 p. e0228029.
- 432 23. Monamele, C.G., et al., *Molecular characterization of influenza A(H1N1)pdm09 in*  
433 *Cameroon during the 2014-2016 influenza seasons*. PLoS One, 2019. **14**(1): p.  
434 e0210119.
- 435 24. Dia, N., et al., *A subregional analysis of epidemiologic and genetic characteristics of*  
436 *influenza A(H1N1)pdm09 in Africa: Senegal, Cape Verde, Mauritania, and Guinea,*  
437 *2009-2010*. Am J Trop Med Hyg, 2013. **88**(5): p. 946-53.
- 438 25. Byarugaba, D.K., et al., *Whole-genome analysis of influenza A(H1N1)pdm09 viruses*  
439 *isolated in Uganda from 2009 to 2011*. Influenza Other Respir Viruses, 2016. **10**(6): p.  
440 486-492.
- 441 26. Mukherjee, A., et al., *Genetic Characterization of Circulating 2015 A(H1N1)pdm09*  
442 *Influenza Viruses from Eastern India*. PLoS One, 2016. **11**(12): p. e0168464.
- 443 27. Jones, S., et al., *Evolutionary, genetic, structural characterization and its functional*  
444 *implications for the influenza A (H1N1) infection outbreak in India from 2009 to 2017*.  
445 Sci Rep, 2019. **9**(1): p. 14690.
- 446 28. Dawa, J., et al., *Developing a seasonal influenza vaccine recommendation in Kenya:*  
447 *Process and challenges faced by the National Immunization Technical Advisory Group*  
448 *(NITAG)*. Vaccine, 2019. **37**(3): p. 464-472.
- 449 29. Owuor, D.C., et al., *Genetic characterization of influenza A(H3N2) viruses circulating*  
450 *in coastal Kenya, 2009-2017*. Influenza and Other Respiratory Viruses, 2020. **14**(3): p.  
451 320-330.
- 452 30. Nyasimi, F.M., et al., *Epidemiological and evolutionary dynamics of influenza B virus*  
453 *in coastal Kenya as revealed by genomic analysis of strains sampled over a single*  
454 *season*. Virus Evolution, 2020. **6**(2).
- 455 31. Goldstein, E.J., et al., *Integrating patient and whole-genome sequencing data to*  
456 *provide insights into the epidemiology of seasonal influenza A (H3N2) viruses*.  
457 Microbial Genomics, 2017. **4**.
- 458 32. Broberg, E., et al., *Improving influenza virological surveillance in Europe: strain-*  
459 *based reporting of antigenic and genetic characterisation data, 11 European countries,*  
460 *influenza season 2013/14*. Euro Surveill, 2016. **21**(41).
- 461 33. Feikin, D.R., et al., *Is Higher Viral Load in the Upper Respiratory Tract Associated*  
462 *With Severe Pneumonia? Findings From the PERCH Study*. Clin Infect Dis, 2017.  
463 **64**(suppl\_3): p. S337-S346.
- 464 34. Lafond, K.E., et al., *Global Role and Burden of Influenza in Pediatric Respiratory*  
465 *Hospitalizations, 1982-2012: A Systematic Analysis*. PLoS medicine, 2016. **13**(3): p.  
466 e1001977-e1001977.
- 467
